# Supplementary material for: Fine-regulating ultramicropores in porous carbonviaa self-sacrificial template route for high-performance supercapacitors
Source: Royal Society of Chemistry journal article supplement (doi:10.1039/d0nr07480b), 2020-12-23
Supplement: d0nr07480b1.pdf [file d0nr07480b1.pdf]

## *Supporting Information*

### **Fine-regulating ultramicropore of porous carbon via a self-sacrificial template route for high-performance supercapacitors**

*Yunbo Zhao,<sup>a</sup> Ye Yuan,<sup>b</sup> Yanmei Xu,<sup>a</sup> Guiyue Zheng,<sup>a</sup> Qian Zhang,<sup>a</sup> Yuqian Jiang,<sup>a</sup> Zeyu Wang,<sup>b</sup> Naishun Bu,<sup>\*c</sup> Lixin Xia,<sup>\*a,d</sup> and Zhuojun Yan<sup>\*a</sup>*

- a. College of Chemistry, Liaoning University, Shenyang 110036, P. R. China.  
E-mail: [lixinxia@lnu.edu.cn](mailto:lixinxia@lnu.edu.cn); [zjyan@lnu.edu.cn](mailto:zjyan@lnu.edu.cn)
- b. Key Laboratory of Polyoxometalate Science of Ministry of Education, Northeast Normal University, Changchun 130024, P. R. China.
- c. School of Environmental Science, Liaoning University, Shenyang 110036, P. R. China. E-mail: [bunaishun@lnu.edu.cn](mailto:bunaishun@lnu.edu.cn)
- d. Yingkou Institute of Technology, Yingkou 115014, P. R. China.

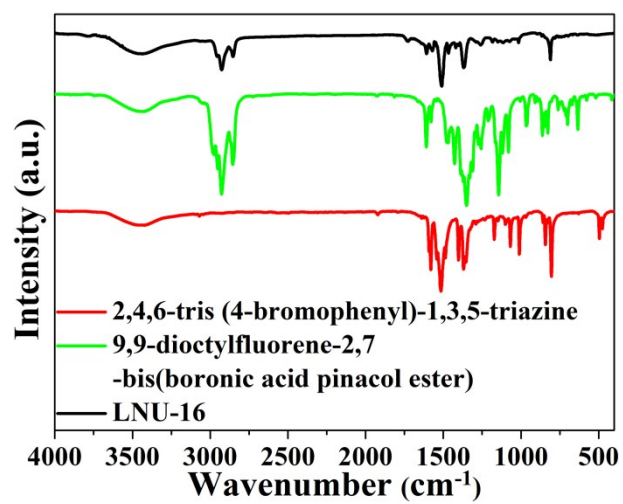

Fig. S1 FTIR spectra for LNU-16 and its monomers.

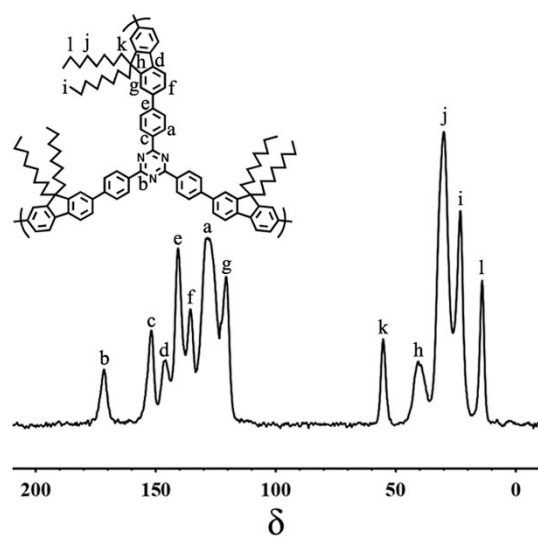

**Fig. S2** Solid-state  $^{13}\text{C}$  CP/ MAS NMR spectrum for LNU-16.

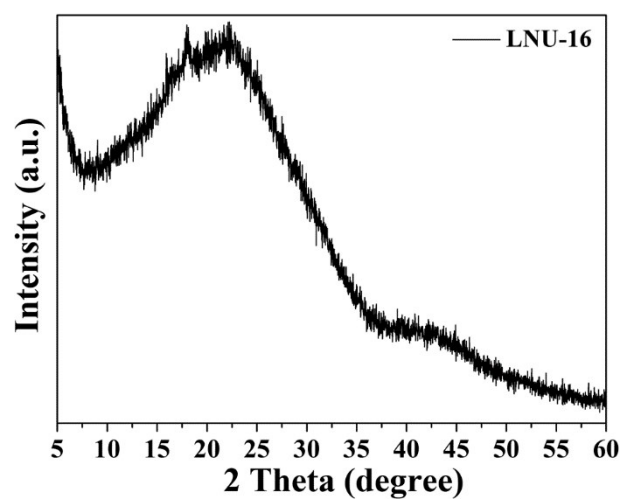

Fig. S3 X-ray diffraction pattern for LNU-16.

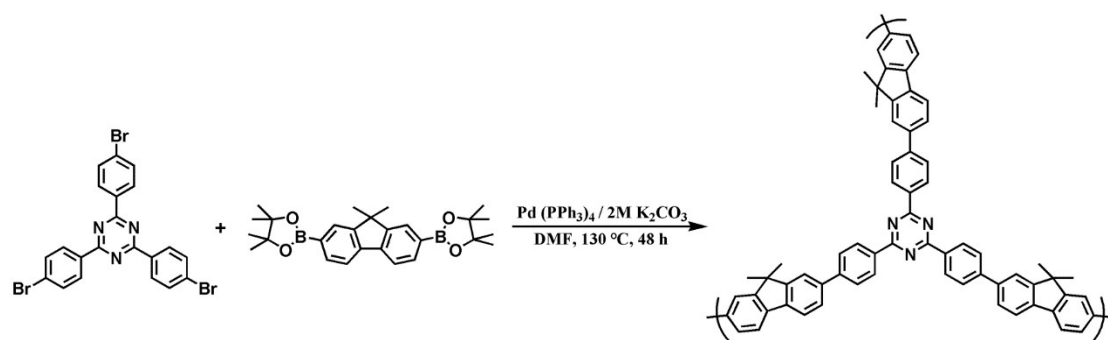

**Fig. S4** Schematic synthesis route for LNU-17.

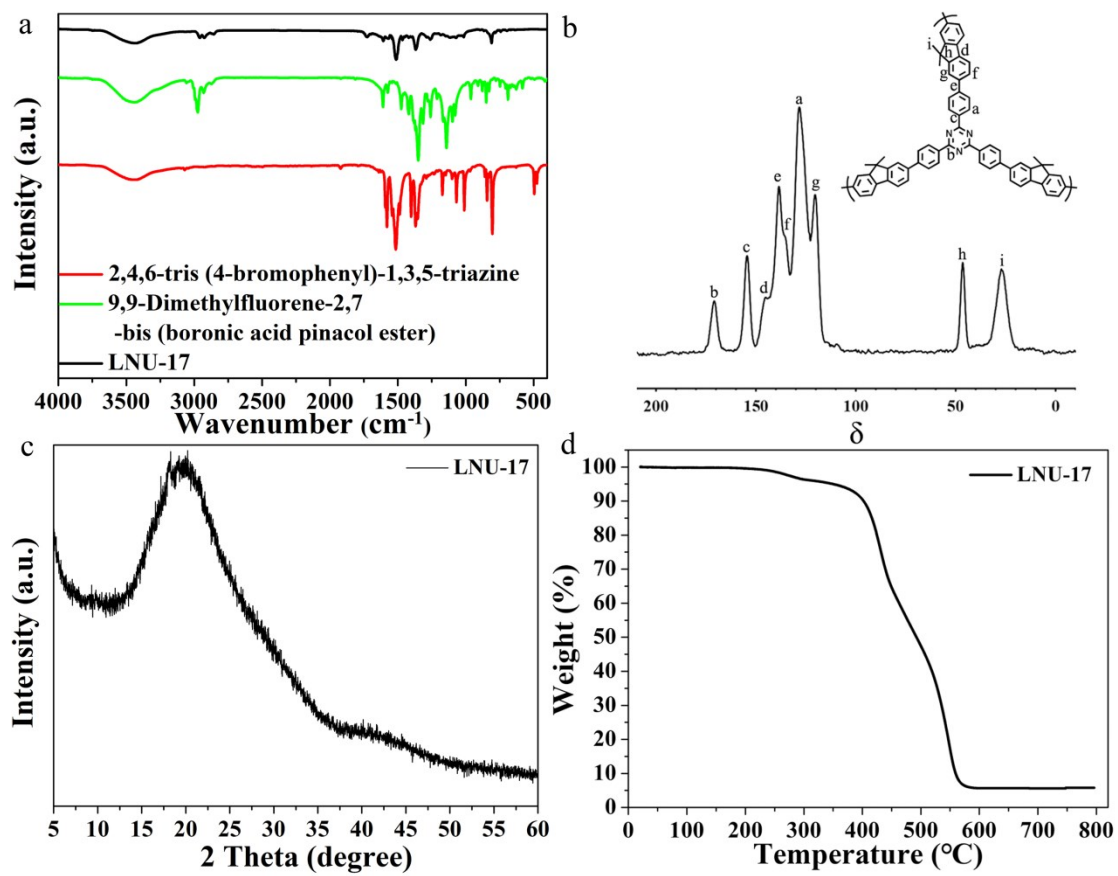

**Fig. S5** (a) FTIR spectra for LNU-17 and its monomers; (b) Solid-state  $^{13}\text{C}$  CP/ MAS NMR spectrum for LNU-17; (c) PXRD pattern for LNU-17; (d) TGA curve in air condition for LNU-17.

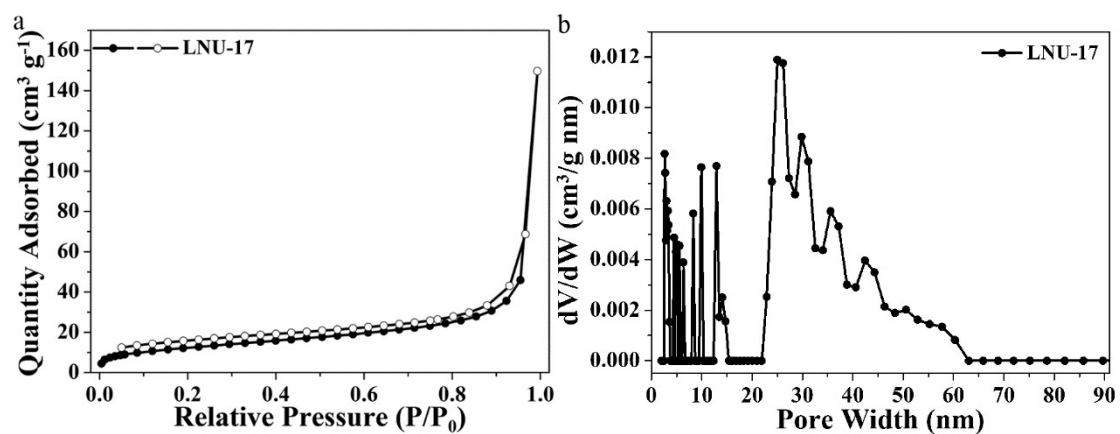

**Fig. S6**  $\text{N}_2$  adsorption (filled symbols)-desorption (empty symbols) isotherms (a) and the pore size distribution curve by the NL-DFT method (b) for LNU-17.

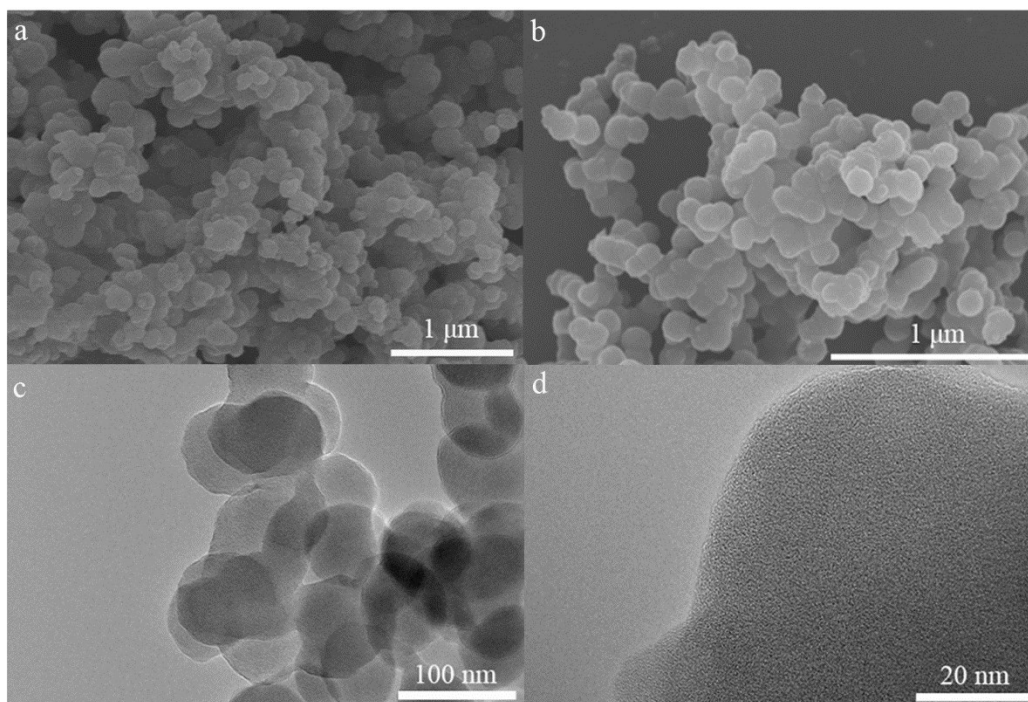

**Fig. S7** SEM (a, b) and TEM (c, d) images for LNU-17.



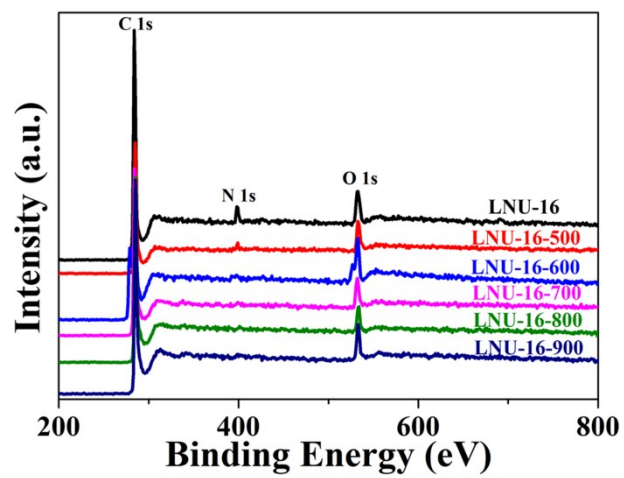

Fig. S8 XPS spectra for LNU-16 and C-LNU-16s.

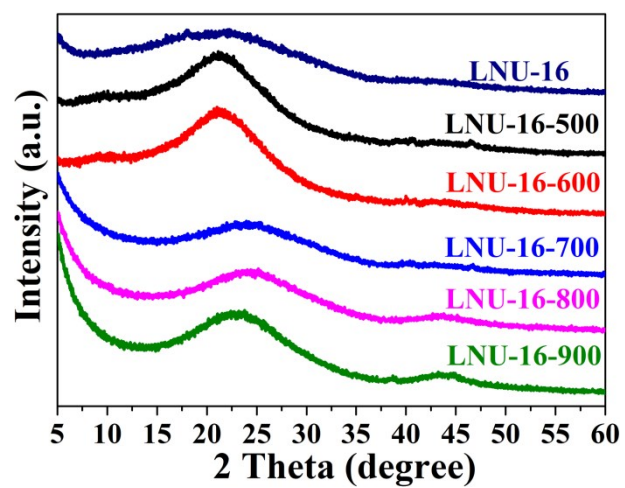

Fig. S9 PXR D patterns for LNU-16 and C-LNU-16s.

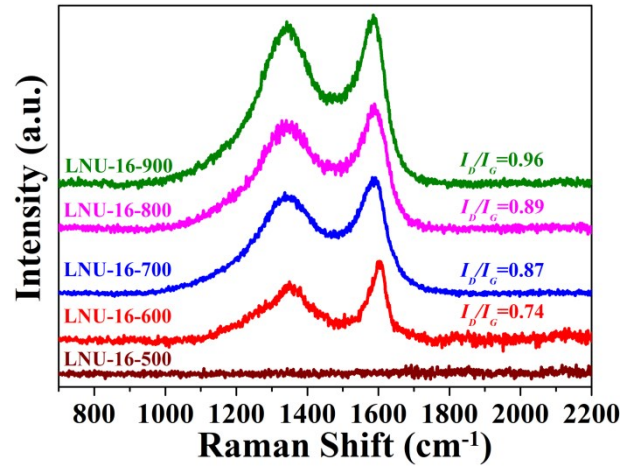

Fig. S10 Raman spectra for C-LNU-16s.

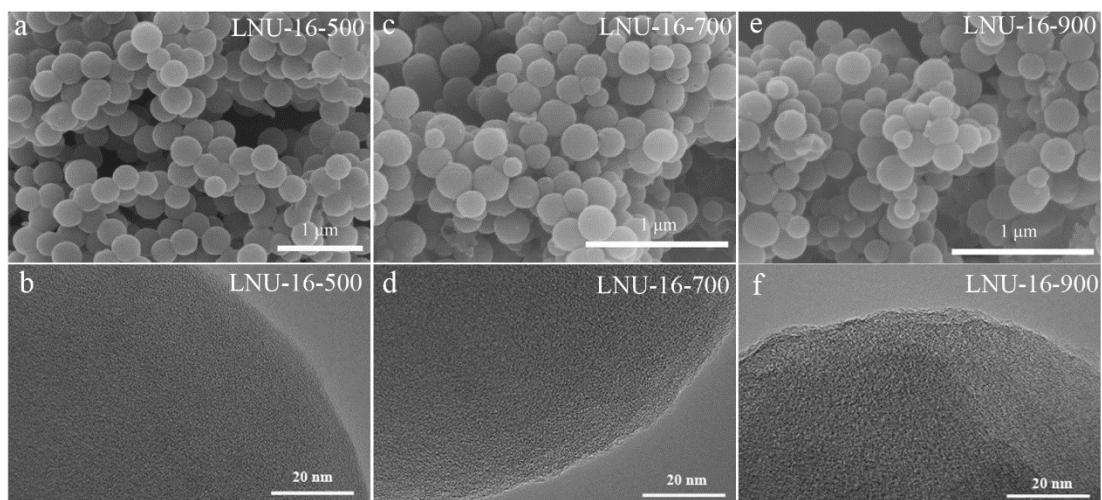

**Fig. S11** SEM (a) and TEM (b) images for LNU-16-500; SEM (c) and TEM (d) images for LNU-16-700; SEM (e) and TEM (f) images for LNU-16-900.

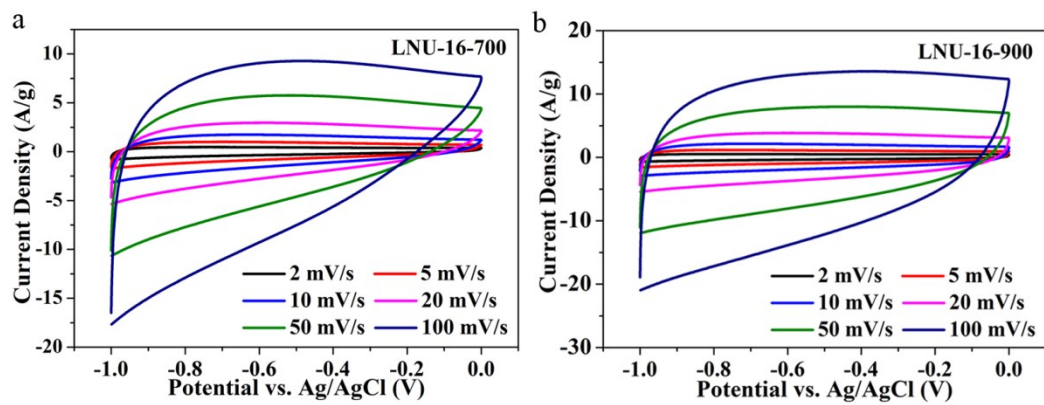

**Fig. S12** CV curves for LNU-16-700 (a) and LNU-16-900 (b) at different scan rates.

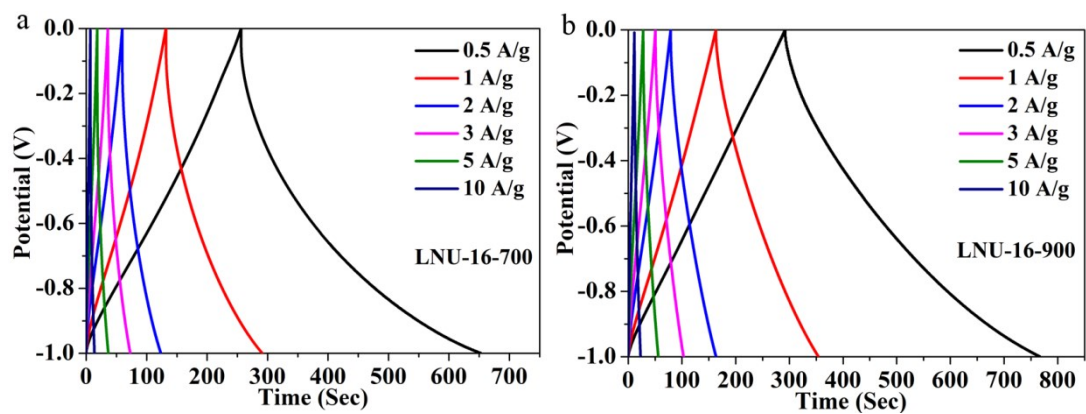

**Fig. S13** GCD curves for LNU-16-700 (a) and LNU-16-900 (b) at different current densities.

**Table S1.** Elemental analysis of LNU-16 and C-LNU-16s

| Samples    | N (%) | C (%) | H (%) |
|------------|-------|-------|-------|
| LNU-16     | 3.34  | 83.67 | 4.49  |
| LNU-16-500 | 4.42  | 85.80 | 3.08  |
| LNU-16-600 | 4.46  | 84.70 | 4.58  |
| LNU-16-700 | 3.47  | 80.06 | 3.53  |
| LNU-16-800 | 2.91  | 82.38 | 0.66  |
| LNU-16-900 | 2.95  | 80.68 | 3.77  |

**Table S2.** Summary of methods for constructing of microporosity and ultramicro-porosity

| Method                                                     | Sample                 | $S_{BET}$<br>( $m^2 g^{-1}$ ) | $V_{Total}$<br>( $cm^3 g^{-1}$ ) | $V_{Micro}$<br>( $cm^3 g^{-1}$ ) | $S_{Micro}$<br>( $m^2 g^{-1}$ ) | $P_{Micropore}$<br>(nm) | Capacitance<br>(F/g)               |
|------------------------------------------------------------|------------------------|-------------------------------|----------------------------------|----------------------------------|---------------------------------|-------------------------|------------------------------------|
| Self-sacrificial<br>template                               | LNU-16-800             | 515.86                        | 0.34                             | 0.204                            | 456.25                          | 0.56, 0.72              | 294 (at 0.5 A/g)<br>242 (at 1 A/g) |
|                                                            | N <sub>2</sub> -PAF-1  | 880                           | 0.44                             | 0.30                             | -                               | 0.60                    | 146 (at 1 A/g)                     |
| Carbonization of PAF-<br>1                                 | CO <sub>2</sub> -PAF-1 | 1513                          | 0.80                             | 0.46                             | -                               | 0.64                    | 159 (at 1 A/g)                     |
|                                                            | Na-PAF-1               | 1916                          | 1.36                             | 0.39                             | -                               | 0.93, 2-4               | 190 (at 1 A/g)                     |
|                                                            | K-PAF-1                | 2926                          | 1.45                             | 1.14                             | -                               | 0.79, 1.30              | 280 (at 1 A/g)                     |
| Template-assisted<br>strategy                              | UMCs                   | 773                           | 0.47                             | 0.39                             | -                               | 0.55-0.57               | -                                  |
|                                                            | 0.95% CoNi/UMCs        | 613                           | 0.41                             | 0.32                             | -                               | 0.57                    | 268 (at 0.25 A/g)                  |
| Carbonization of<br>nanoparticles or<br>microspheres       | UCNs                   | 842                           | 0.74                             | 0.25                             | 549                             | 0.54, 0.60              | 206 (at 1 A/g)                     |
|                                                            | UCMs                   | 579                           | 0.29                             | 0.23                             | 505                             | 0.50, 1.50              | 45 (at 1 A/g)                      |
| Self-temple strategy                                       | HPCFs                  | 1650                          | 1.26                             | -                                | -                               | 1.8                     | 206 (at 1 A/g)                     |
|                                                            | HPCF-0                 | 131                           | -                                | -                                | -                               | -                       | -                                  |
| Carbonization of<br>covalent benzoxazine<br>framework      | N-DMC                  | 1469                          | -                                | -                                | 988.89                          | 1.43                    | 185 (at 1 A/g)                     |
| Carbonization of N-<br>doped microporous<br>carbon spheres | N-MCS <sub>700</sub>   | 1478                          | 0.76                             | -                                | 1412                            | 0.57, 0.86, 1.26        | 292 (at 1 A/g)                     |



**Table S3.** Comparison of specific capacitance data of previous reported carbon materials

| Sample                        | Capacitance<br>(F/g)       | Current density<br>(A/g) | Electrolyte | Ref.                                |      |
|-------------------------------|----------------------------|--------------------------|-------------|-------------------------------------|------|
| Carbon spheres                | PCS-8                      | 227                      | 1           | 6 M KOH                             | [1]  |
|                               | PCS                        | 240                      | 1           | 6 M KOH                             | [2]  |
|                               | MCSs-0.4                   | 310                      | 0.5         | 6 M KOH                             | [3]  |
| Carbon nanotubes              | PC-CNTs                    | 250                      | 0.1         | 6 M KOH                             | [4]  |
|                               | Si/CNFs                    | 175                      | 1           | 6 M KOH                             | [5]  |
| N-doped porous<br>carbons     | AC-900                     | 278                      | 1           | 6 M KOH                             | [6]  |
|                               | NPHCMs-65-800              | 200                      | 0.5         | 6 M KOH                             | [7]  |
| Hierarchical porous<br>carbon | HPC                        | 204                      | 0.5         | 6 M KOH                             | [8]  |
| COF-based materials           | ACOF1                      | 234                      | 1           | 6 M KOH                             | [9]  |
|                               | DAB-TFP COF                | 98                       | 0.5         | 1 M H <sub>2</sub> SO <sub>4</sub>  | [10] |
|                               | TaPa-Py COF                | 209                      | 0.5         | 1 M H <sub>2</sub> SO <sub>4</sub>  | [10] |
| CMP-based materials           | TAT-CMP-2                  | 183                      | 1           | 1 M Na <sub>2</sub> SO <sub>4</sub> | [11] |
|                               | N3-CMP                     | 260                      | 0.1         | 3 M KOH                             | [12] |
| MOF-based materials           | PC-Zn                      | 138                      | 0.5         | 6 M KOH                             | [13] |
|                               | Cu <sub>1.96</sub> S/C-650 | 200                      | 0.5         | 1 M H <sub>2</sub> SO <sub>4</sub>  | [14] |

## References

- [1] M. X. Guo, J. X. Guo, F. L. Tong, D. Z. Jia, W. Jia, J. B. Wu, L. X. Wang and Z. P. Sun, *RSC Adv.*, 2017, **7**, 45363-45368.
- [2] L. L. Zhang, L. Liu, Y. F. Yu, H. J. Lv, S. L. Hou and A. B. Chen, *J. Mater. Sci.-Mater. Electron.*, 2019, **30**, 3316-3324.
- [3] Z. G. Liang, L. M. Zhang, H. Liu, J. P. Zeng, J. F. Zhou, H. J. Li and H. Xia, *Nanoscale Res. Lett.*, 2019, **14**, 124-130.
- [4] D. H. Wang, Y. Chen, H. Q. Wang, P. H. Zhao, W. Liu, Y. Z. Wang and J. L. Yang, *Appl. Surf. Sci.*, 2018, **457**, 1018-1024.
- [5] Y. L. Zhao, Z. Zhao, M. Z. Wei, X. C. Jiang, H. M. Li, J. Gao and L. X. Hou, *Prog. Nat. Sci.*, 2018, **28**, 337-344.
- [6] M. Kim, P. Puthiaraj, Y. J. Qian, Y. Kim, S. Jang, S. Hwang, E. Na, W. Ahn and S. E. Shim, *Electrochim. Acta*, 2018, **284**, 98-107.
- [7] N. Zhang, F. Liu, S. D. Xu, F. Y. Wang, Q. Yu and L. Liu, *J. Mater. Chem. A*, 2017, **5**, 22631-22640.
- [8] F. J. Miao, C. L. Shao, X. H. Li, K. X. Wang, N. Lu and Y. C. Liu, *J. Mater. Chem. A*, 2016, **4**, 5623-5631.
- [9] G. Y. Kim, J. Yang, N. Nakashima and T. Shiraki, *Chem. Eur. J.*, 2017, **23**, 17504-17510.
- [10] A. M. Khattak, Z. A. Ghazi, B. Liang, N. A. Khan, A. Lqbal, L. S. Li and Z. Y. Tang, *J. Mater. Chem. A*, 2016, **4**, 16312-16317.
- [11] X. C. Li, Y. Z. Zhang, C. Y. Wang, Y. Wan, W. Y. Lai, H. Pang and W. Huang, *Chem. Sci.*, 2017, **8**, 2959-2965.
- [12] J. M. Lee, T. H. Wu, B. M. Alston, M. E. Briggs, T. Hasell, C. C. Hu and A. I. Cooper, *J. Mater. Chem. A*, 2016, **4**, 7665-7673.
- [13] M. L. Yue, C. Y. Yu, H. H. Duan, B. L. Yang, X. X. Meng and Z. X. Li, *Chem. Eur. J.*, 2018, **24**, 16160-16169.
- [14] R. B. Wu, D. P. Wang, V. Kumar, K. Zhou, A. Law, P. S. Lee, J. Lou and Z. Chen, *Chem. Commun.*, 2015, **51**, 3109-3112.
